# Supplementary material for: Fabrication of tough, anisotropic, chemical-crosslinker-free poly(vinyl alcohol) nanofibrous cryogels via electrospinning
Source: Royal Society of Chemistry journal article supplement (doi:10.1039/d0ra07322a), 2020-01-01
Supplement: d0ra07322a1.pdf [file d0ra07322a1.pdf]

## Supplementary information

### **Fabrication of tough, anisotropic, chemically crosslinker-free poly(vinyl alcohol) nanofibrous cryogels via electrospinning**

**Yoshiyasu Nagakawa<sup>a,b</sup>, Mikiya Kato<sup>b</sup>, Shin-ichiro Suye<sup>b,c</sup> and Satoshi Fujita<sup>b,c\*</sup>**

<sup>a</sup>Biotechnology Group, Tokyo Metropolitan Industrial Technology Research Institute, 2-4-10, Aomi, Koto-ku, Tokyo, 135-0064, Japan.

<sup>b</sup>Department of Frontier Fiber Technology and Sciences, Graduate School of Engineering University of Fukui, 3-9-1, Bunkyo, Fukui, 910-8507, Japan.

<sup>c</sup>Life science innovation Center, University of Fukui, 3-9-1, Bunkyo, Fukui, 910-8507, Japan.

\*Corresponding author at: Department of Frontier Fiber Technology and Science, Graduate School of Engineering, University of Fukui, 3-9-1 Bunkyo, Fukui 910-8507, Japan  
Tel/Fax: +81-776-27-9969, E-mail: fujitas@u-fukui.ac.jp

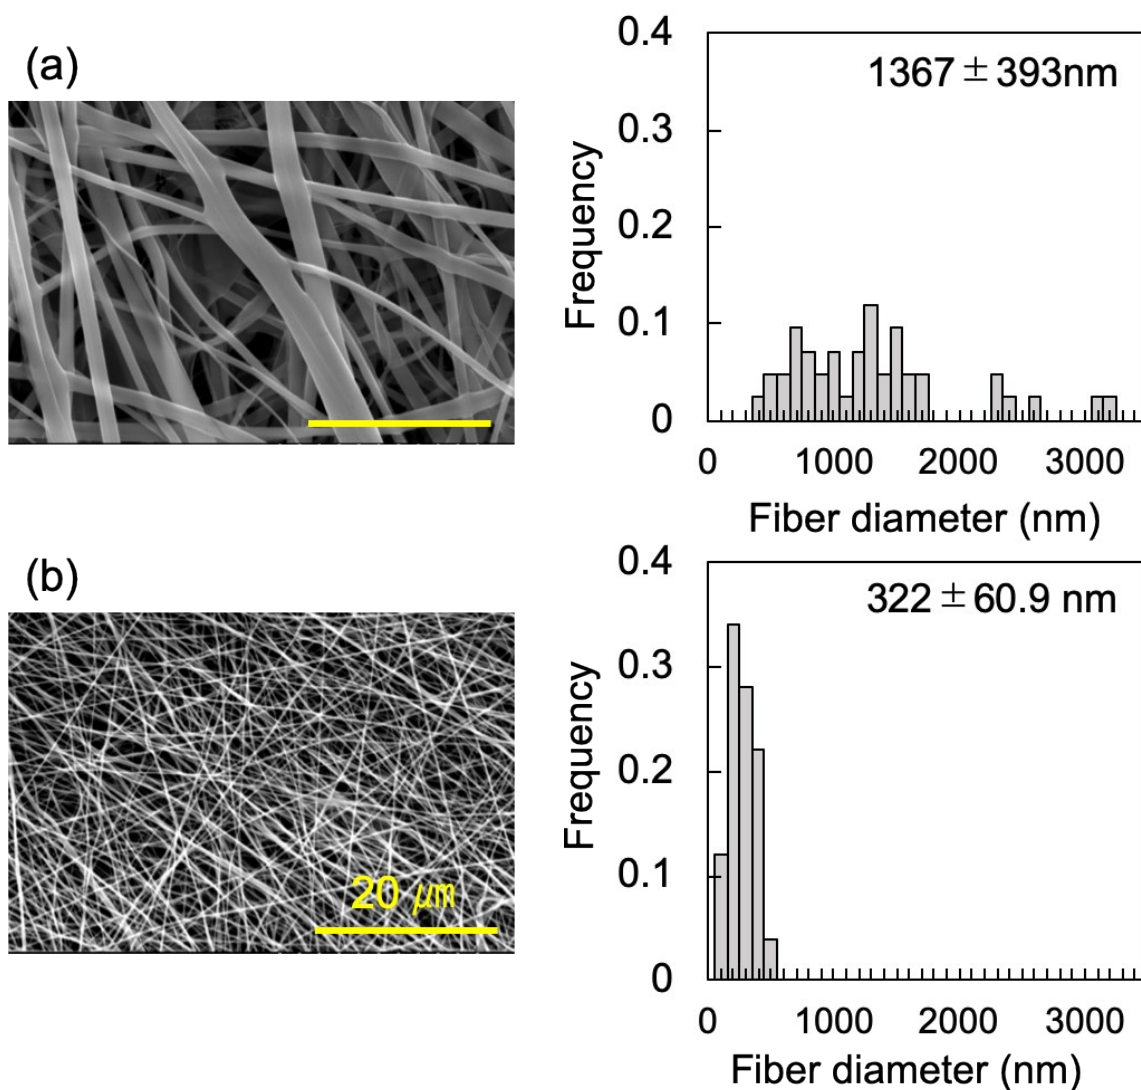

**Fig. S1** Morphologies of PVA/HFIP and PVA nanofibers. SEM images and the distribution of fiber diameters of (a) 4%PVA/HFP nanofiber, (b) 15%PVA/water nanofiber.

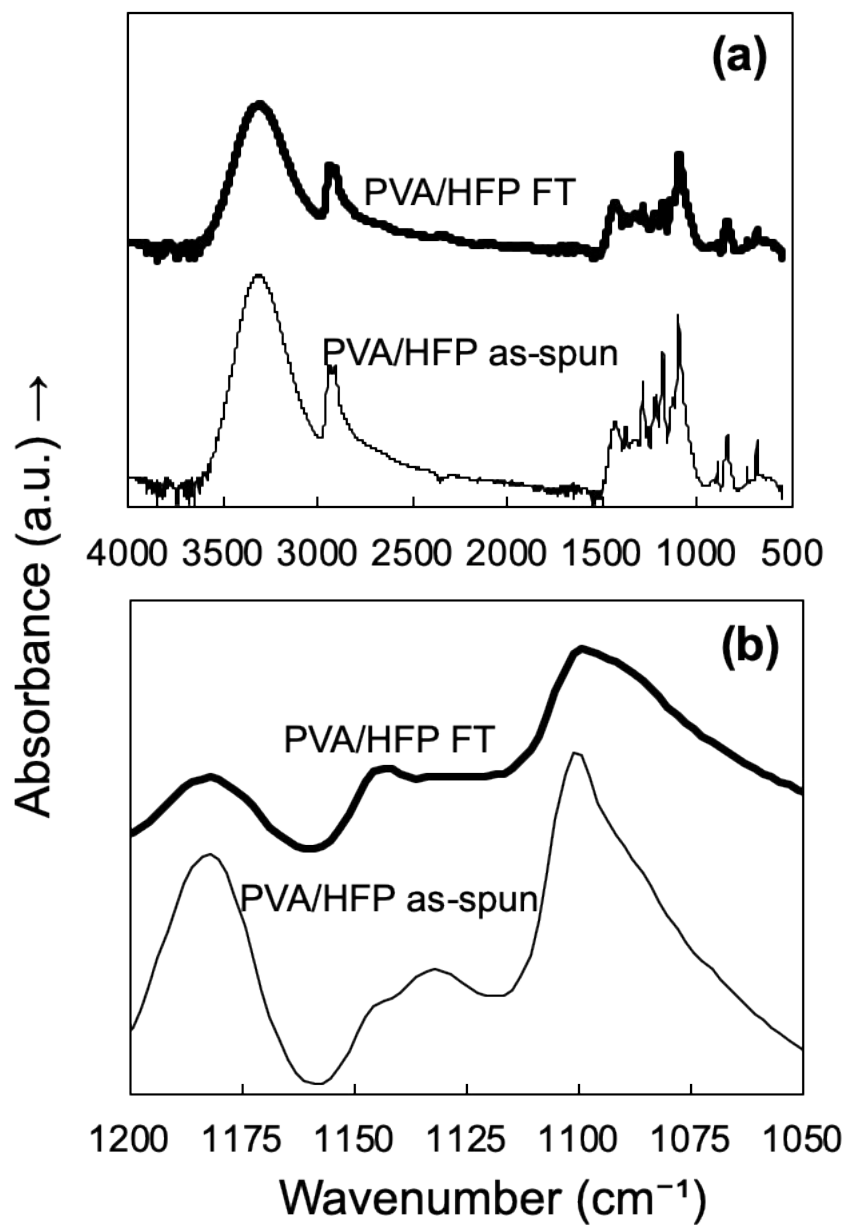

**Fig. S2** ATR-FTIR spectra of the (a) PVA/HFIP as-spun and PVA/HFIP FT nanofibers. The figure in parts (b) is magnification of (a).
